# Supplementary material
Source: PubMed Central journal article supplement (PMC2744635)

Supplementary Fig. 1

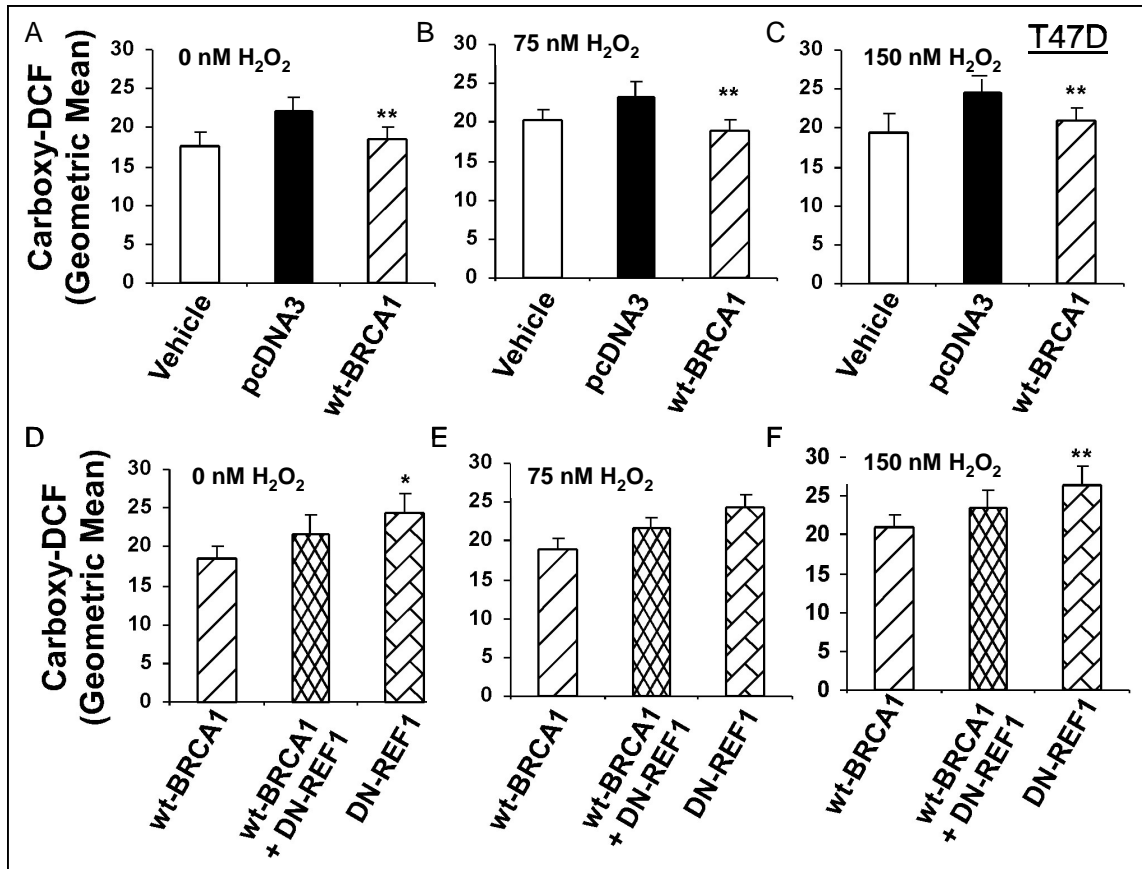

Supplement: NIHMS129728-supplement-01.pdf [file NIHMS129728-supplement-01.pdf]

Supplementary Fig. 2

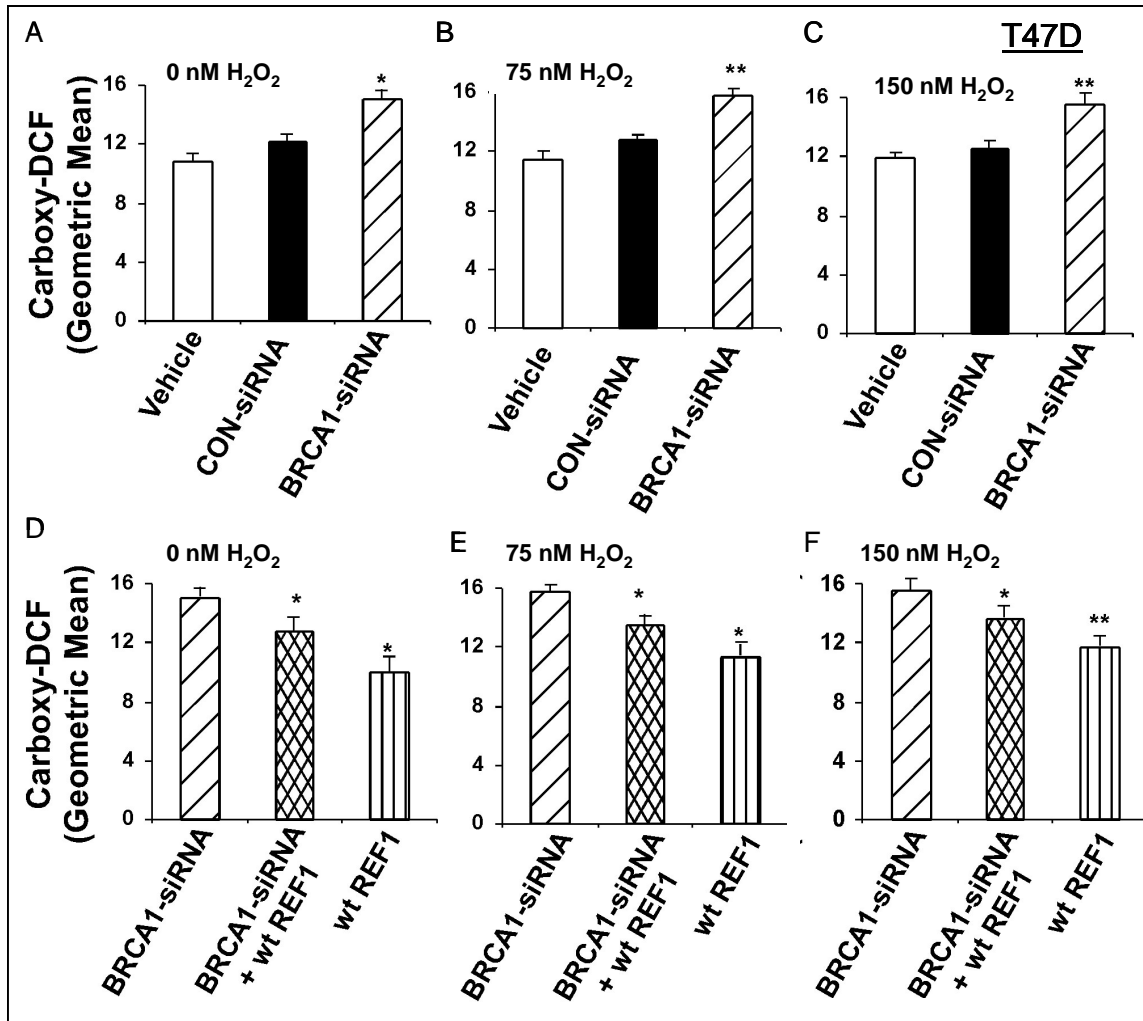

Supplement: NIHMS129728-supplement-02.pdf [file NIHMS129728-supplement-02.pdf]

Supplementary Fig. 3

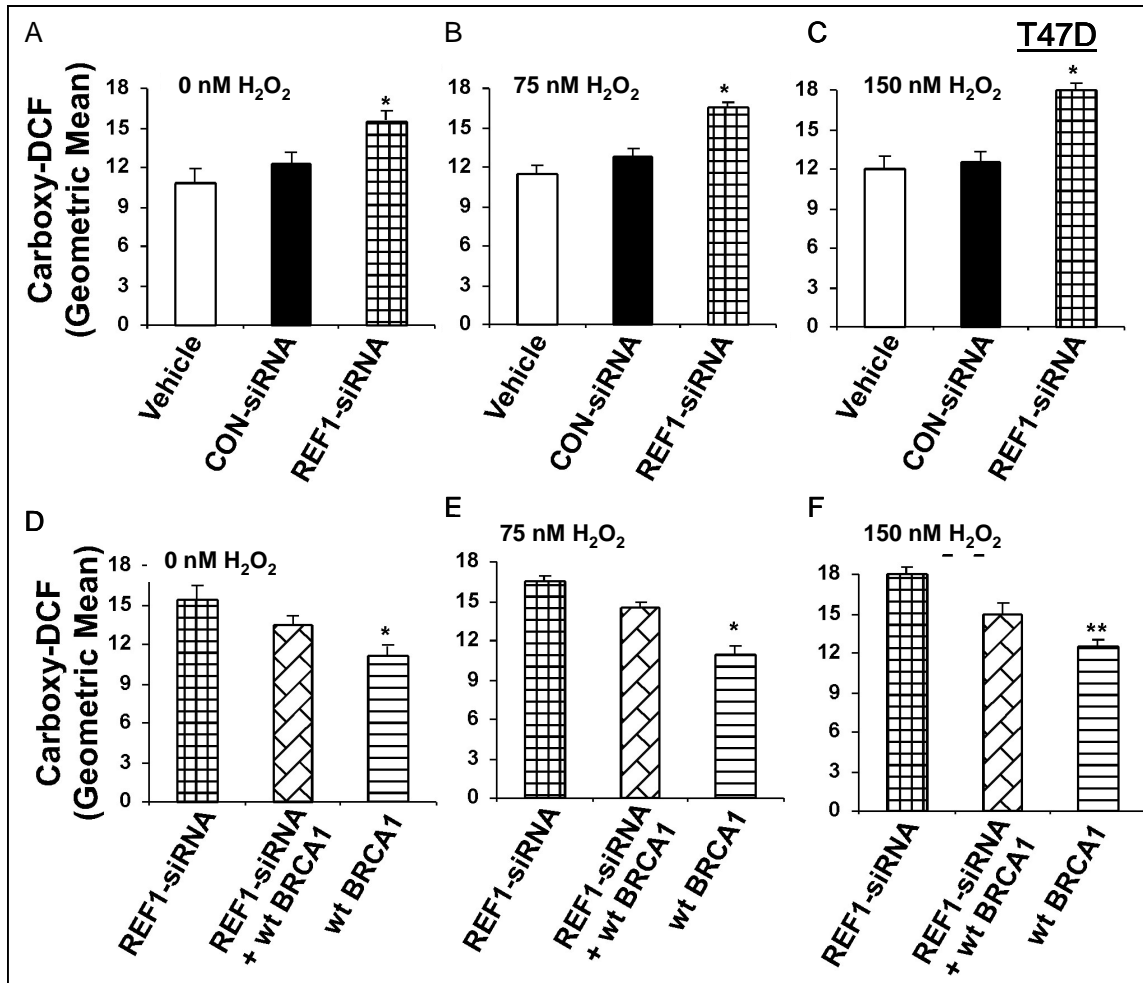

Supplement: NIHMS129728-supplement-03.pdf [file NIHMS129728-supplement-03.pdf]

Supplementary Fig. 4

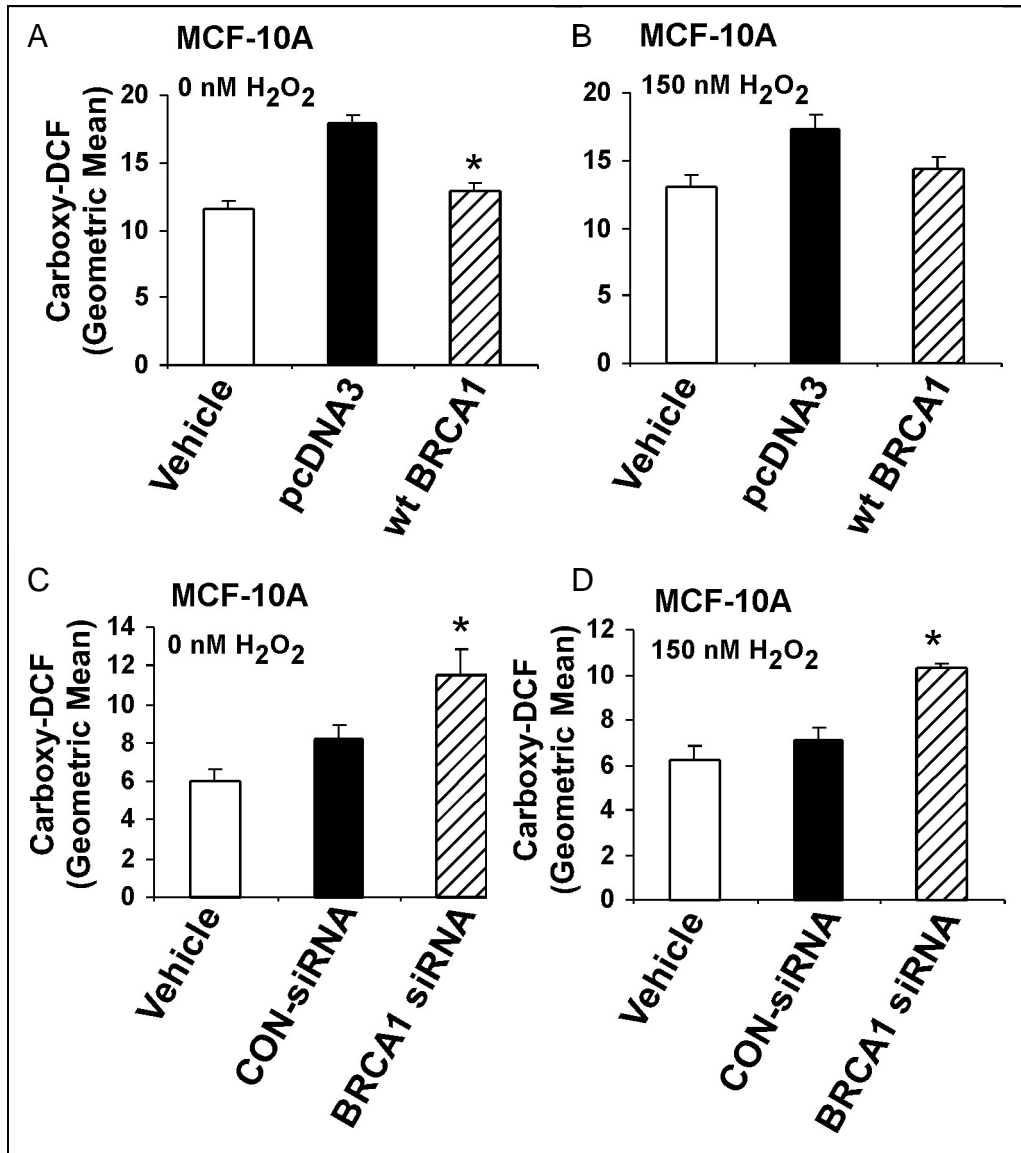

Supplement: NIHMS129728-supplement-04.pdf [file NIHMS129728-supplement-04.pdf]

Supplementary Fig. 5

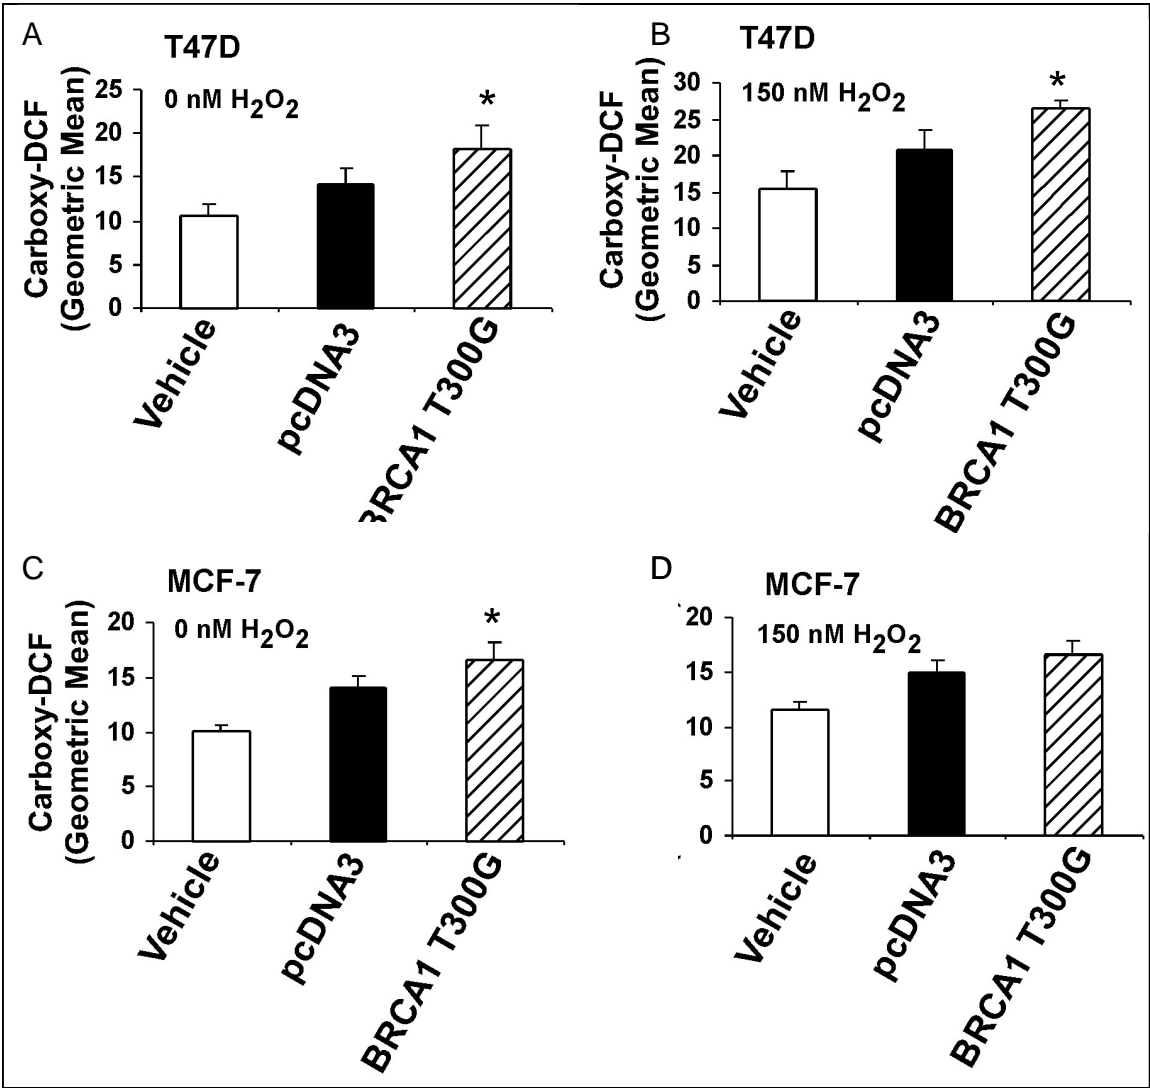

Supplement: NIHMS129728-supplement-05.pdf [file NIHMS129728-supplement-05.pdf]

Supplementary Fig. 6

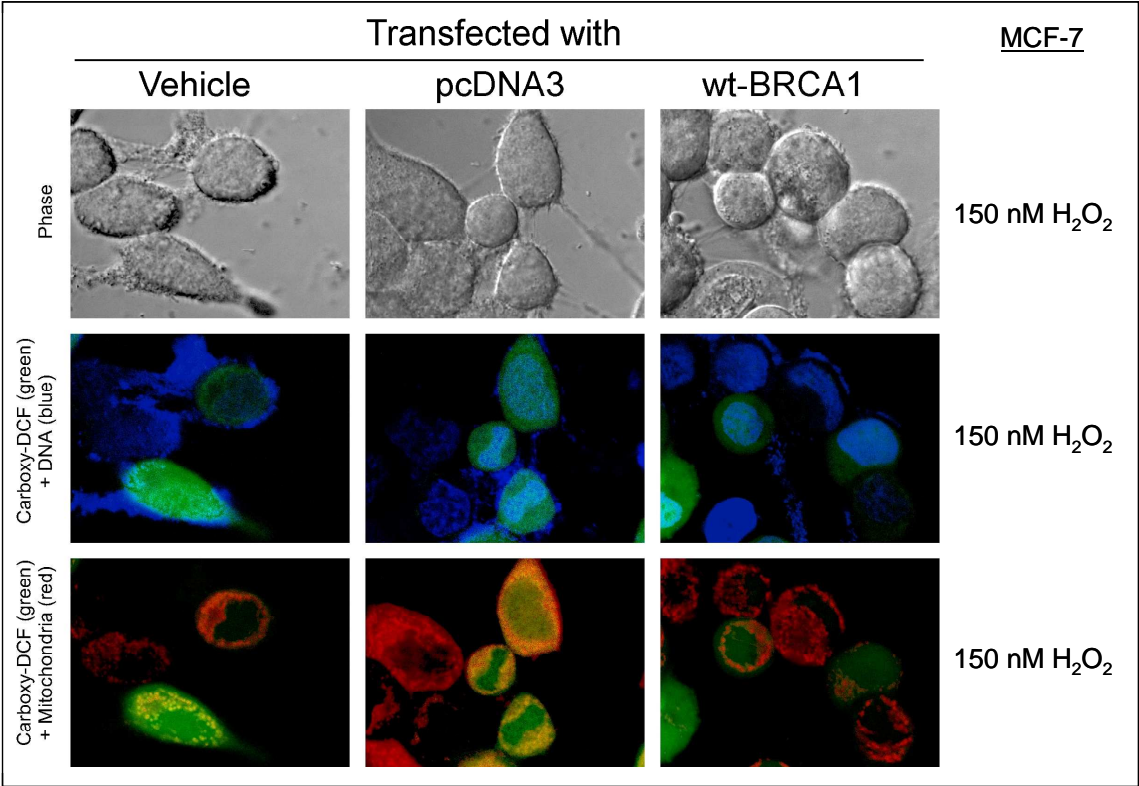

Supplement: NIHMS129728-supplement-06.pdf [file NIHMS129728-supplement-06.pdf]

Supplementary Fig. 7

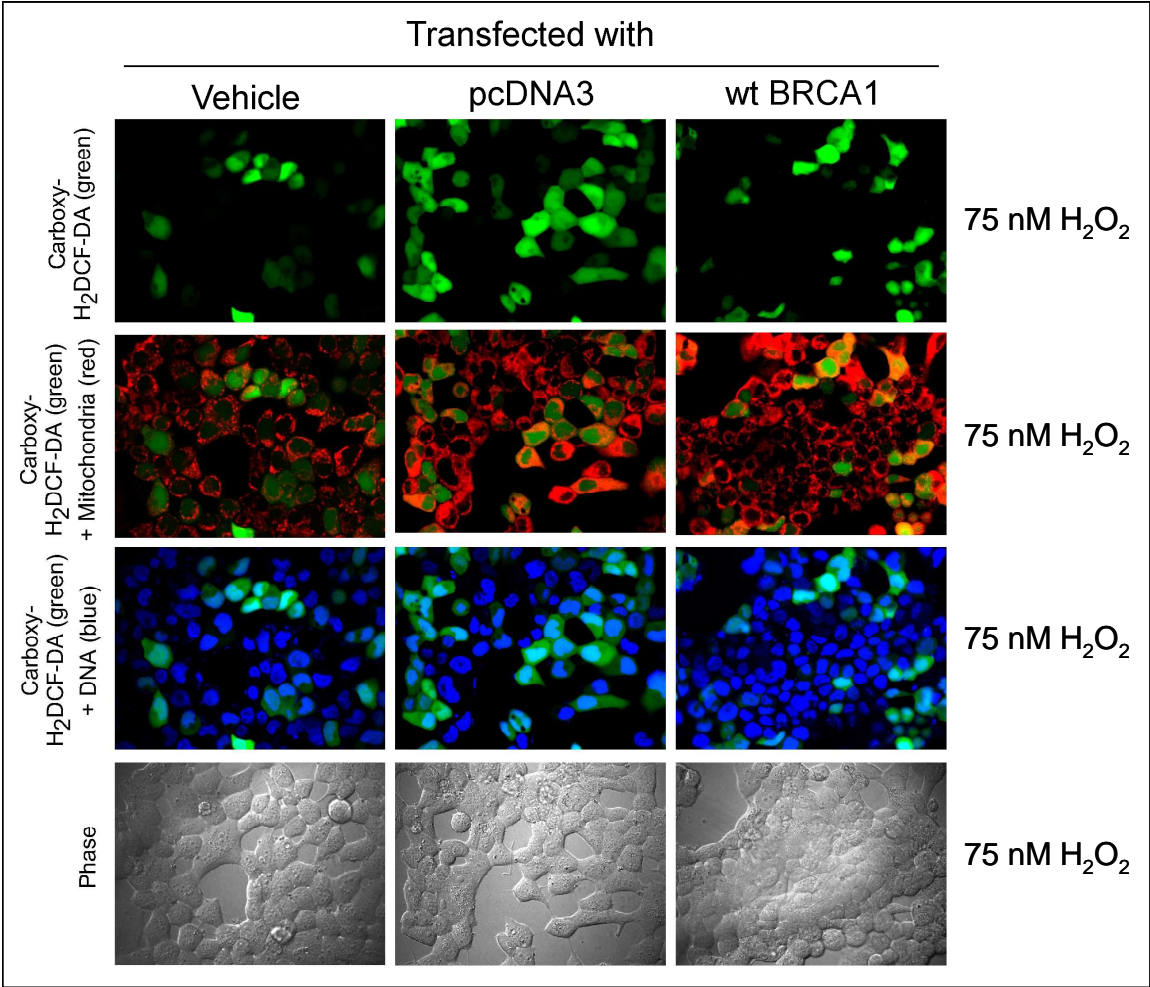

Supplement: NIHMS129728-supplement-07.pdf [file NIHMS129728-supplement-07.pdf]

Supplementary Fig. 8

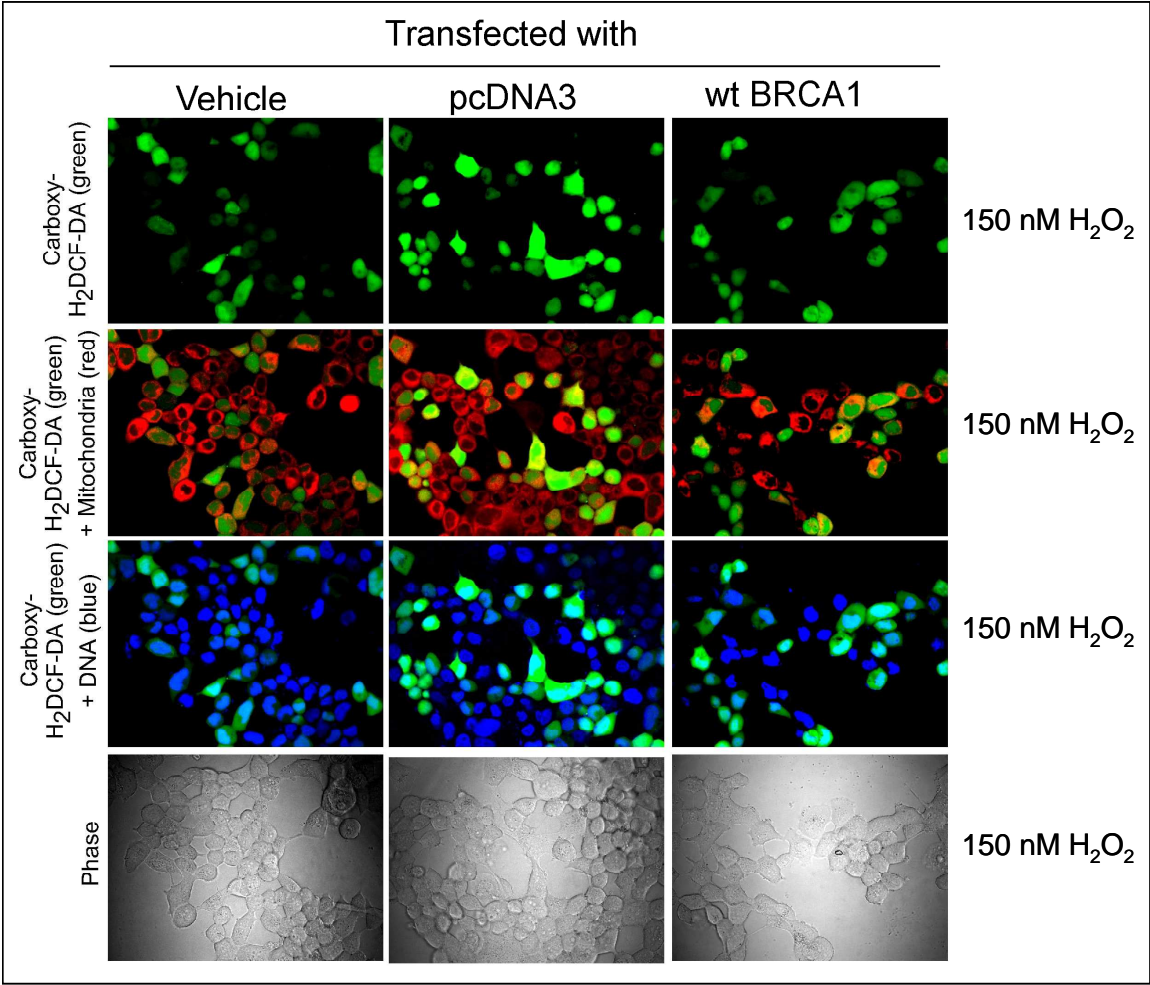

Supplement: NIHMS129728-supplement-08.pdf [file NIHMS129728-supplement-08.pdf]

Supplementary Fig. 9

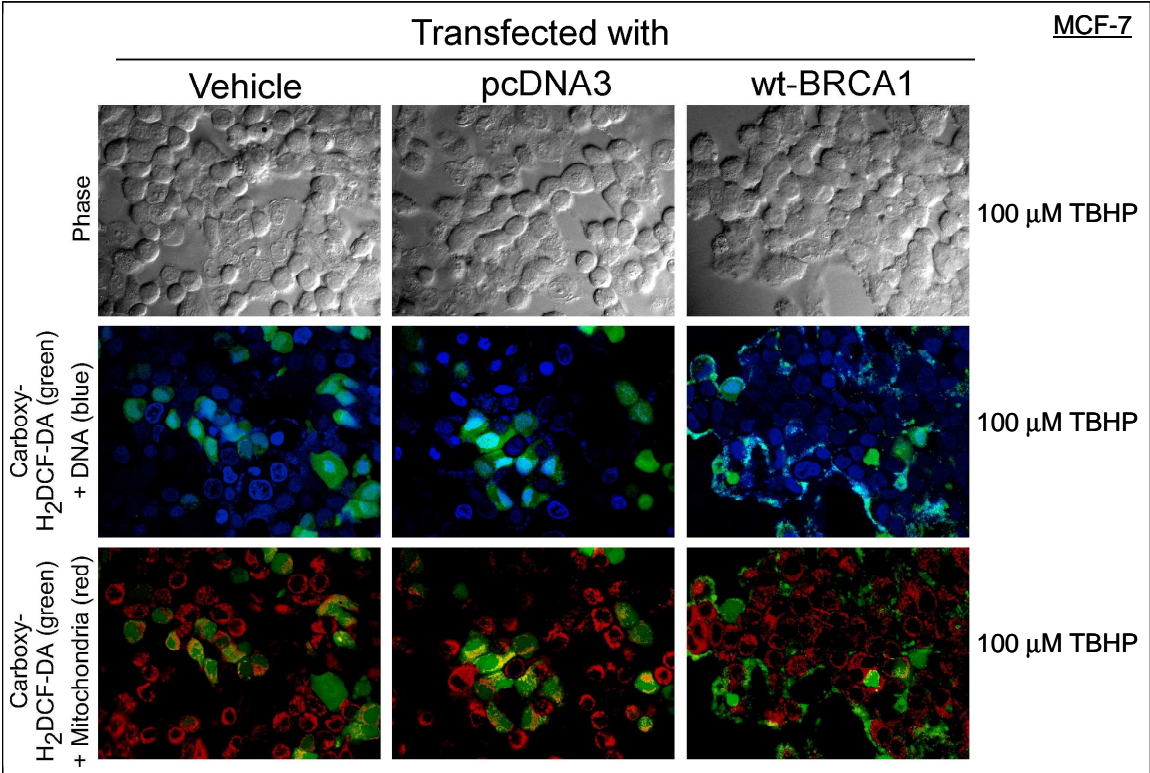

Supplement: NIHMS129728-supplement-09.pdf [file NIHMS129728-supplement-09.pdf]

Supplementary Fig. 10

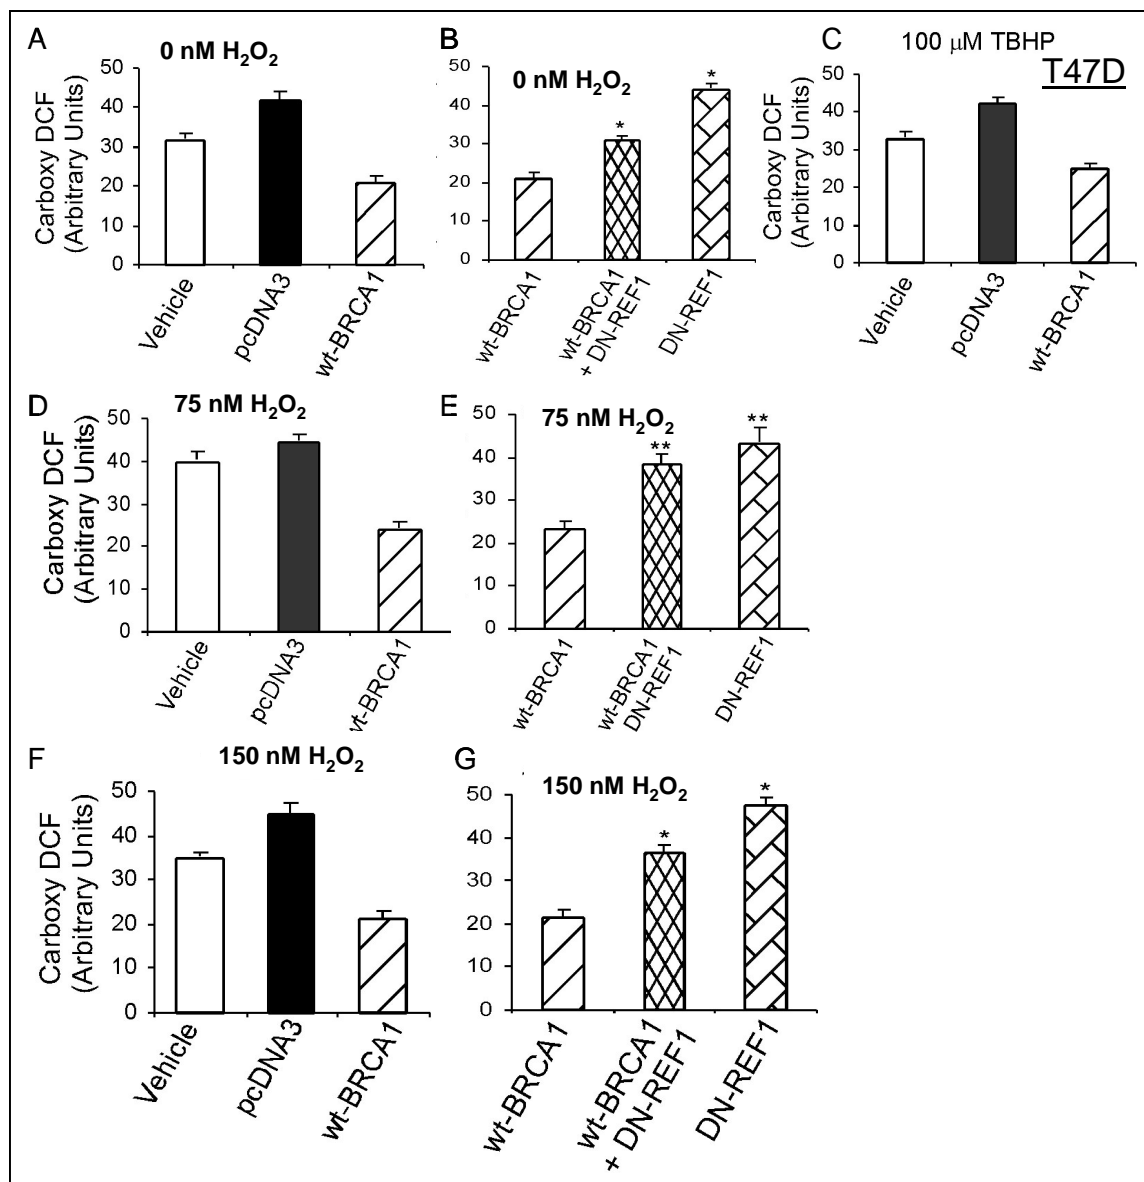

Supplement: NIHMS129728-supplement-10.pdf [file NIHMS129728-supplement-10.pdf]
